# Supplementary material for: A novel amplification strategy for genotyping with liquid chromatography-electrospray ionization mass spectrometry
Source: Royal Society of Chemistry journal article supplement (doi:10.1039/c2an35440c), 2012-01-01
Supplement: c2an35440c.pdf [file c2an35440c.pdf]

**Electronic Supplementary Material to**

**A novel amplification strategy for genotyping with liquid chromatography-electrospray ionization mass spectrometry**

Beate Beer<sup>1,+</sup>, Kaarel Krjutškov<sup>2,+</sup>, Robert Erb<sup>1</sup>, Triin Viltrop<sup>3</sup>, Herbert Oberacher<sup>1,\*</sup>

<sup>1</sup> Institute of Legal Medicine, Innsbruck Medical University, Innsbruck 6020, Austria

<sup>2</sup> Estonian Genome Center, University of Tartu, Tartu 50410, Estonia

<sup>3</sup> Clinic of Hematology and Oncology, University of Tartu, Puusepa 6, Tartu 51014, Estonia

<sup>+</sup> Beate Beer and Kaarel Krjutškov contributed equally to this work.

\* Corresponding author:

Assoc.Prof. Dr. Herbert Oberacher

Institute of Legal Medicine, Innsbruck Medical University, Muellerstrasse 44, 6020  
Innsbruck, Austria.

E-mail: herbert.oberacher@i-med.ac.at

Tel.: +43 (0)512 9003 70639

Fax: +43 (0)512 9003 73600

**Table S1.** Different APEX-2 multiplex sets generated for ICEMS analysis.

**CALL RATE (%)**

100      95      86      90      74      70

**AMPLICON LENGTH**

| 5-plex | 10-plex | 15-plex | 20-plex | 25-plex | 30-plex |
|--------|---------|---------|---------|---------|---------|
| 79     | 79      | 79      | 79      | 79      | 79      |
| 89     | 89      | 89      | 89      | 89      | 89      |
| 100    | 100     | 100     | 100     | 100     | 100     |
| 110    | 110     | 110     | 110     | 110     | 110     |
| 126    | 126     | 126     | 126     | 126     | 126     |
|        | 84      | 84      | 84      | 84      | 84      |
|        | 94      | 94      | 94      | 94      | 94      |
|        | 104     | 104     | 104     | 104     | 104     |
|        | 107     | 107     | 107     | 107     | 107     |
|        | 115     | 115     | 115     | 115     | 115     |
|        |         | 82      | 82      | 82      | 82      |
|        |         | 92      | 92      | 92      | 92      |
|        |         | 97      | 97      | 97      | 97      |
|        |         | 112     | 112     | 112     | 112     |
|        |         | 121     | 121     | 121     | 121     |
|        |         |         | 86      | 86      | 86      |
|        |         |         | 88      | 88      | 88      |
|        |         |         | 95      | 95      | 95      |
|        |         |         | 102     | 102     | 102     |
|        |         |         | 122     | 122     | 122     |
|        |         |         |         | 80      | 80      |
|        |         |         |         | 99      | 99      |
|        |         |         |         | 108     | 108     |
|        |         |         |         | 113     | 113     |
|        |         |         |         | 119     | 119     |
|        |         |         |         |         | 83      |
|        |         |         |         |         | 87      |
|        |         |         |         |         | 98      |
|        |         |         |         |         | 103     |
|        |         |         |         |         | 123     |

**Material and Methods S1. Confirmatory sequencing experiments.**

The 23 candidate regions were sequenced in 19 individuals (6.7 % of all study subjects). The studied regions were amplified by PCR in a 15 µl volume containing 1× Reaction Buffer B (Naxo, Tartu, Estonia), 0.25 mM of each dNTP (Fermentas), 2.5 mM MgCl<sub>2</sub>, 1.25 U Hot Fire Polymerase (Solis Biodyne, Tartu, Estonia), 1.2 µM of each primer (Metabion) and 33–56 ng of template DNA. For this purpose, the same primers were used as for the multiplex PCR protocol. After the first round of both strand sequencing, six primer pairs were re-designed (Table S2). Cycling was performed with a GeneAmp PCR System 2700 thermocycler (Life Technologies) under the following conditions: 95°C/15 min (initial denaturation), 10 cycles of 95°C/30 sec, 64°C/30 sec, 62°C/30 sec, 60°C/30 sec and 72°C/20 sec, 27 cycles of 95°C/30 sec, 55°C/30 sec and 72°C/20 sec 64°C, and 72°C/1 min.

PCR product purification was carried out with Exonuclease I and Shrimp Alkaline Phosphatase treatment. Ten units of ExoI and 1 U SAP (both Fermentas) were added to 5 µl of PCR product and incubated at 37°C/20 min and at 80°C/15 min. The BigDye Terminator v3.1 Cycle Sequencing Kit (Life Technologies) was applied in a 10 µl reaction volume containing 1 µl of purified PCR product, 0.7 µl BigDye Terminator Ready Reaction Premix, 2 µl of BigDye Terminator Sequencing Buffer and 0.9 µM sequencing primer (universal primer 1 and 2). Cycling was carried out by a GeneAmp PCR System 2700 thermocycler under following conditions: 95°C/20 sec, 30 cycles of 50°C/15 sec, and 60°C/1 min. The extension products were purified according to dextran/ethanol precipitation protocol. The purified pellet was dissolved in 10 µl of formamide, followed by electrophoresis on the ABI Prism 3730 DNA Analyzer (Life Technologies).

**Table S2.** Sequences of the newly designed sequencing primers.

| SNP        | Fw                      | Rev                     |
|------------|-------------------------|-------------------------|
| rs4680     | GATCCAAGTCCCCTCTCT      | GGGCCTGGTGATAGTGG       |
| rs2306283  | CTGTAAGAGTCAAATGTTTTTCC | GGGAAATTGACAGAAAGTACTCT |
| rs1805008  | CACTCACCCATGTACTGCTTCA  | AGGATGGTGAGGGTGACAGC    |
| rs9479757  | TTGATCGATACATTGCAGTC    | ATTTGCCATGTAGTCAGCC     |
| rs11568563 | ACAAGGGGCCATGGTCATA     | TTTTATGGAAGGCCAACTGTG   |
| rs7439366  | TTGCCTACATTTTTGCCTAC    | TCCCATCTTTCTTTCAGTGT    |

**Table S3.** Comparison of the genotypes determined by ICEMS and those assessed in the first and second round of Sanger sequencing.

| Sample       | SNP        | ICEMS results |            | Sanger sequencing     |                       | 2 <sup>nd</sup> round read display                                                    |
|--------------|------------|---------------|------------|-----------------------|-----------------------|---------------------------------------------------------------------------------------|
|              |            | Multiplex     | Singleplex | 1 <sup>st</sup> round | 2 <sup>nd</sup> round |                                                                                       |
| <b>Ko54</b>  | rs4680     | G/A           | G/A        | A/A                   | G/A                   | 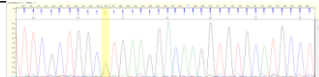   |
| <b>Ko40</b>  | rs2306283  | C/T           | C/T        | C/C                   | C/T                   |    |
| <b>Ko82</b>  | rs9479757  | G/A           | G/A        | A/A                   | G/A                   |   |
| <b>Ko41</b>  | rs7439366  | T/T           | T/T        | C/T                   | T/T                   |  |
| <b>Met76</b> | rs4680     | G/A           | G/A        | A/A                   | G/A                   |  |
| <b>Met14</b> | rs7439366  | T/T           | T/T        | C/T                   | T/T                   |  |
| <b>Bup62</b> | rs1805008  | C/T           | C/T        | C/C                   | C/T                   |  |
| <b>Bup01</b> | rs7439366  | T/T           | T/T        | C/T                   | T/T                   |  |
| <b>Met57</b> | rs948854   | A/G           | G/G        | G/G                   | G/G                   |  |
| <b>Ko40</b>  | rs11568563 | A/A           | A/C        | C/C                   | C/C                   |  |
